# Supplementary material for: The unexpected photoelectrochemical activity of MAX phases: the role of oxide impurities
Source: Royal Society of Chemistry journal article supplement (doi:10.1039/d2ta06929f), 2023-01-01
Supplement: d2ta06929f1.pdf [file d2ta06929f1.pdf]

## Supplementary Information

# The unexpected photoelectrochemical activity of MAX phases: the role of oxide impurities

*Michela Sanna<sup>a</sup>, Katarina A. Novčić<sup>a</sup>, Siowwoon Ng<sup>a</sup>, Miroslav Černý<sup>b,c</sup>, and Martin*

*Pumera<sup>\*a,d,e</sup>.*

<sup>a</sup>Future Energy and Innovation Laboratory, Central European Institute of Technology, Brno University of Technology, Purkyňova 123, 61200 Brno, Czech Republic.

<sup>b</sup>Central European Institute of Technology, Brno University of Technology, Technická 2, CZ-616 69 Brno, Czech Republic

<sup>c</sup>Faculty of Mechanical Engineering, Brno University of Technology, Technická 2, CZ-616 69 Brno, Czech Republic

<sup>d</sup>Department of Chemical and Biomolecular Engineering, Yonsei University, 50 Yonsei-ro, Seodaemun-gu, Seoul 03722, Korea.

<sup>e</sup>Department of Medical Research, China Medical University Hospital, China Medical University, No. 91 Hsueh-Shih Road, Taichung 40402, Taiwan.

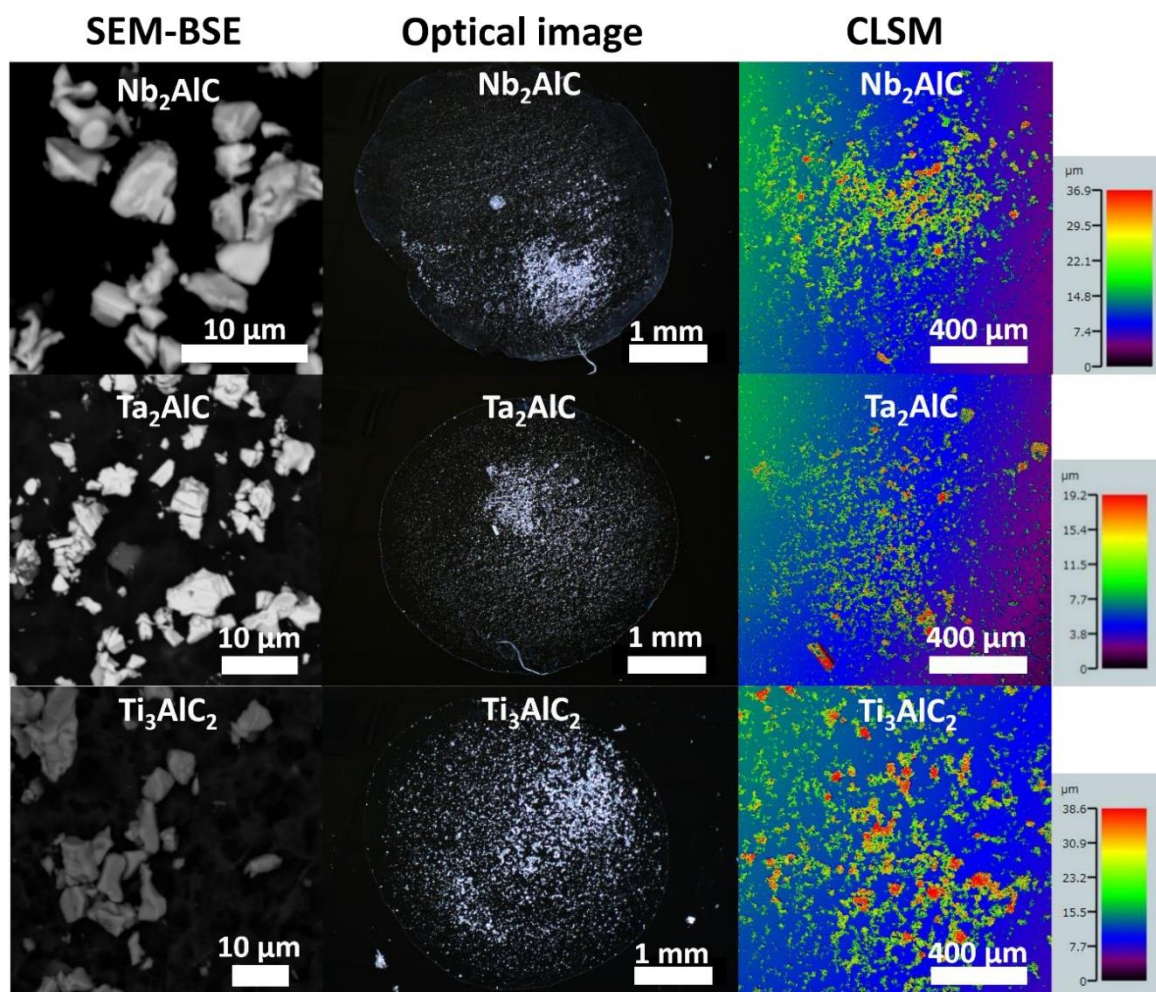

**Figure S1.** Analysis of the drop-casted  $\text{Nb}_2\text{AlC}$ ,  $\text{Ta}_2\text{AlC}$ , and  $\text{Ti}_3\text{AlC}_2$ , showing (from left to right column) back-scattered electrons micrographs (SEM-BSE), optical images, and coloured confocal laser scanning micrographs (CLSM).

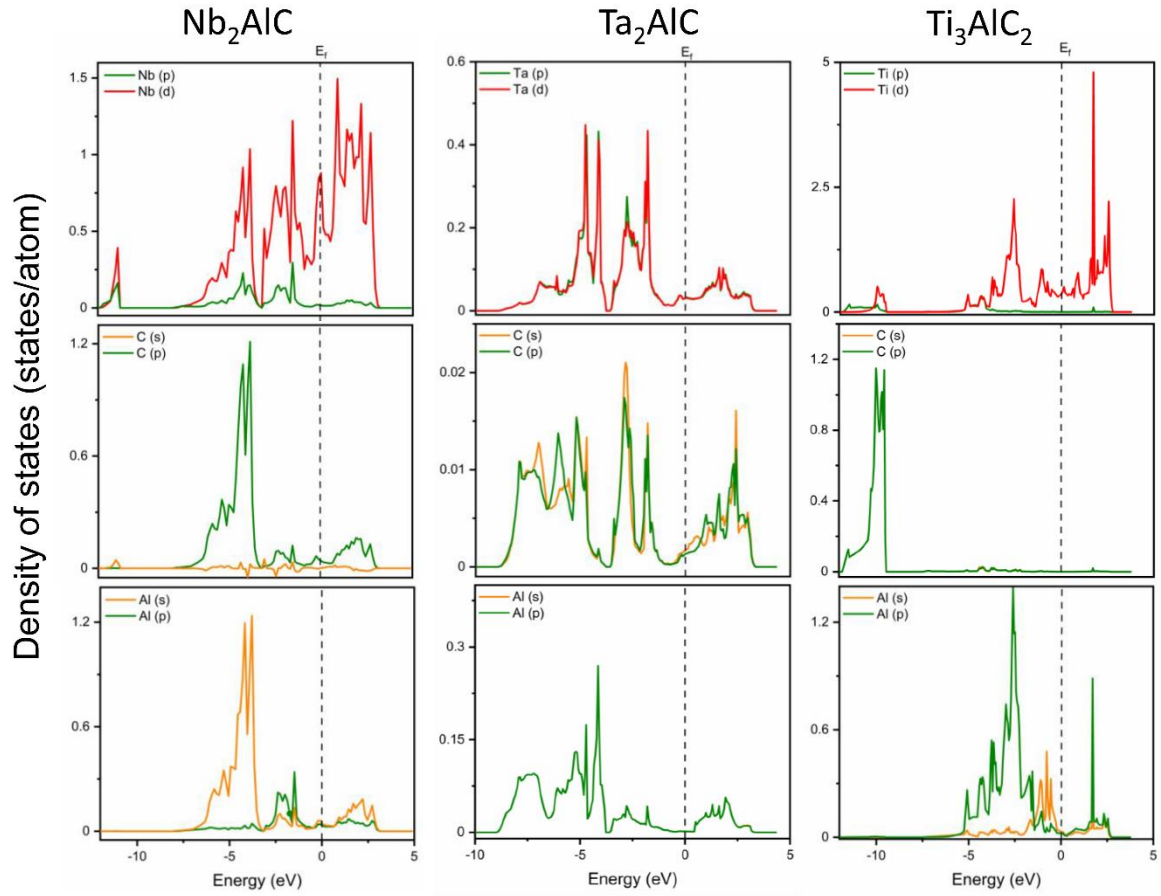

**Figure S2.** Element and orbital resolved density of states for  $\text{Nb}_2\text{AlC}$ ,  $\text{Ta}_2\text{AlC}$  and  $\text{Ti}_3\text{AlC}_2$  MAX phases. The Fermi level is shown by the black dashed line.

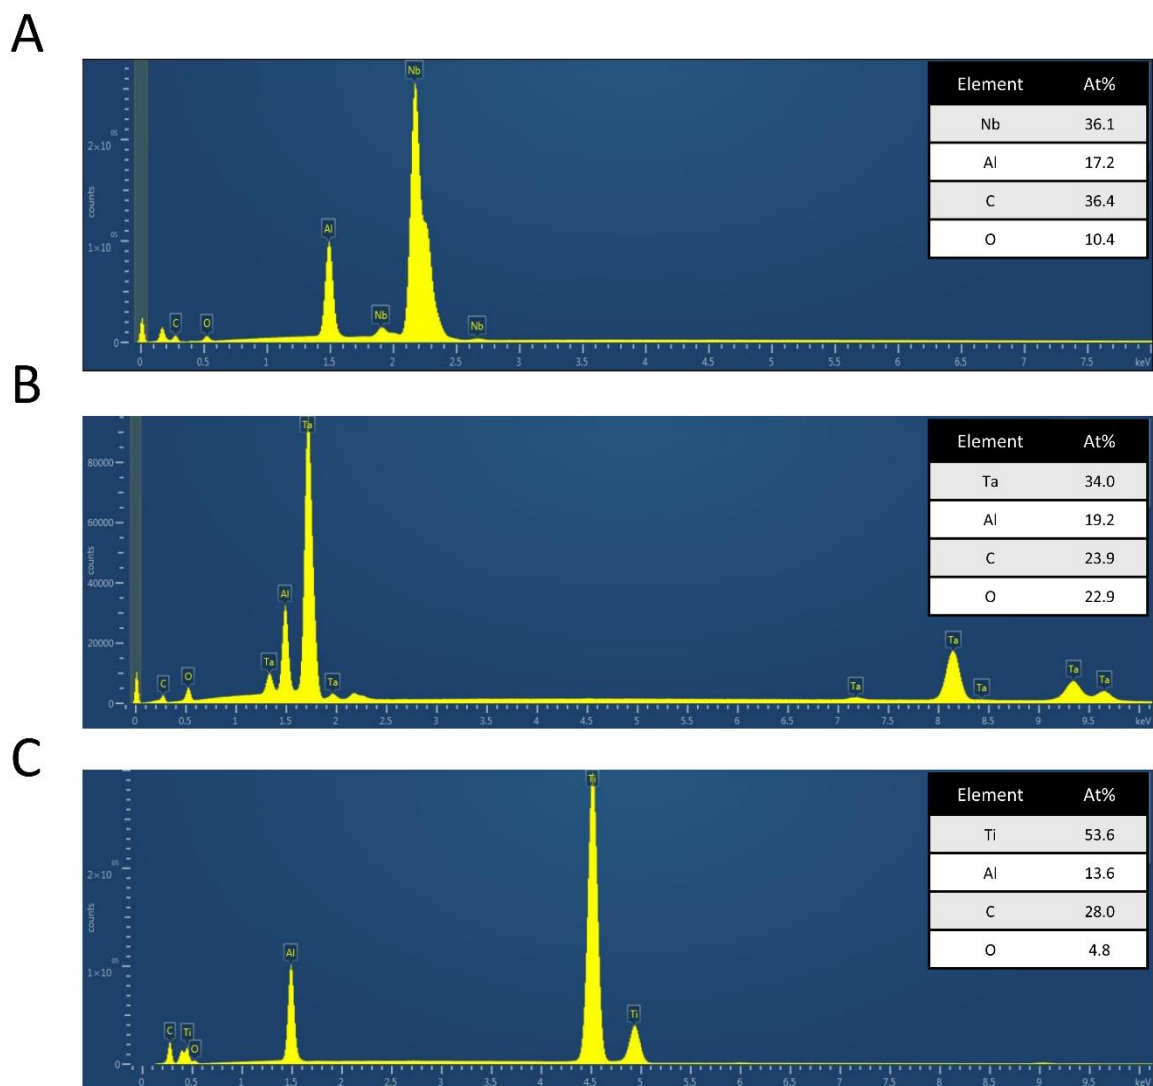

**Figure S3.** EDS spectra of MAX phases, Nb<sub>2</sub>AlC (A), Ta<sub>2</sub>AlC (B), and Ti<sub>3</sub>AlC<sub>2</sub> (C). Inset shows the atomic percentage (At %) of the relevant elements.

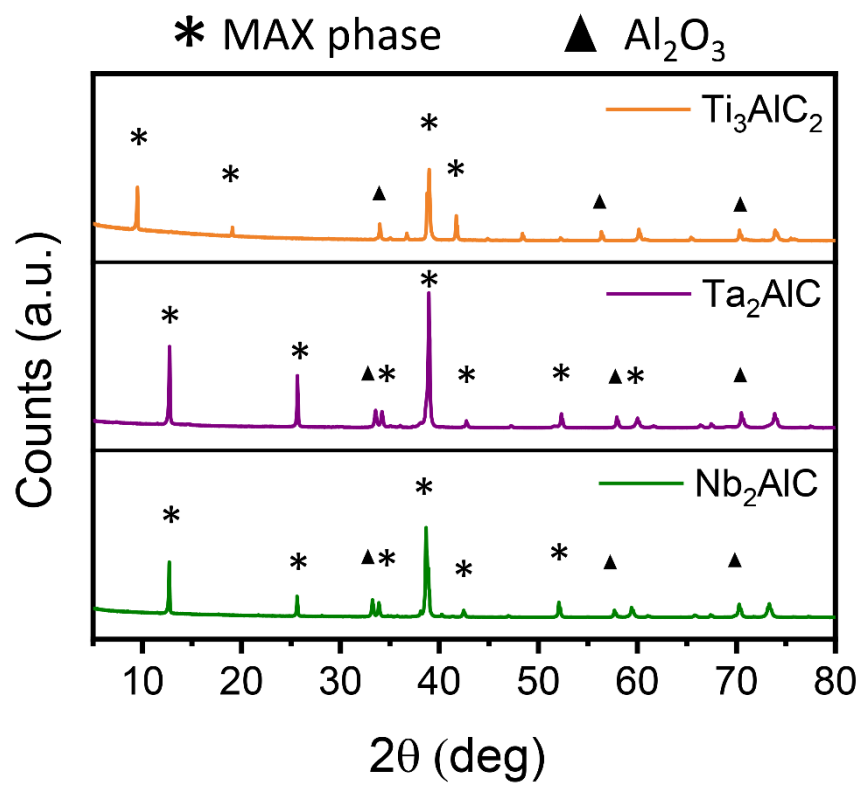

**Figure S4.** XRD patterns of  $\text{Nb}_2\text{AlC}$ ,  $\text{Ta}_2\text{AlC}$ , and  $\text{Ti}_3\text{AlC}_2$ .

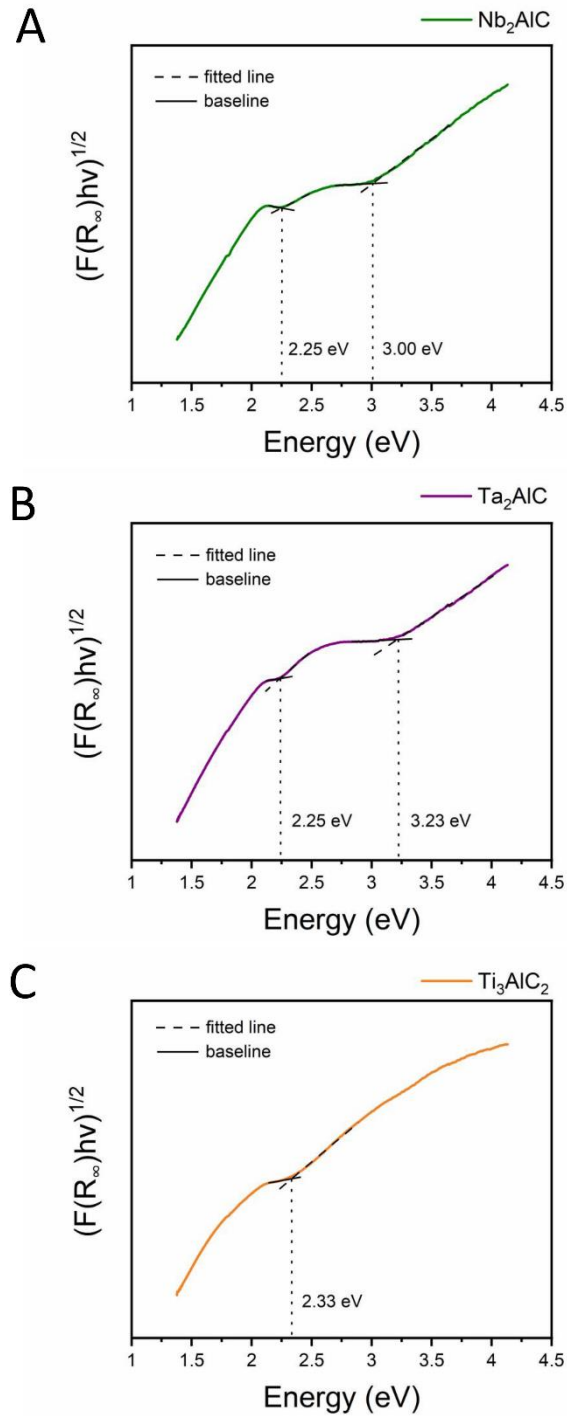

**Figure S5.** Tauc plots of the Kubelka-Munk function calculated from the reflectance spectrum of Nb<sub>2</sub>AlC (A), Ta<sub>2</sub>AlC (B), and Ti<sub>3</sub>AlC<sub>2</sub> (C), assuming indirect transition. The dashed and solid black lines show the fitted line from the Tauc method and the baseline, respectively. The estimated band gap values are reported and correspond to the abscissa of the intersection of the two lines, as shown by the dotted vertical line.

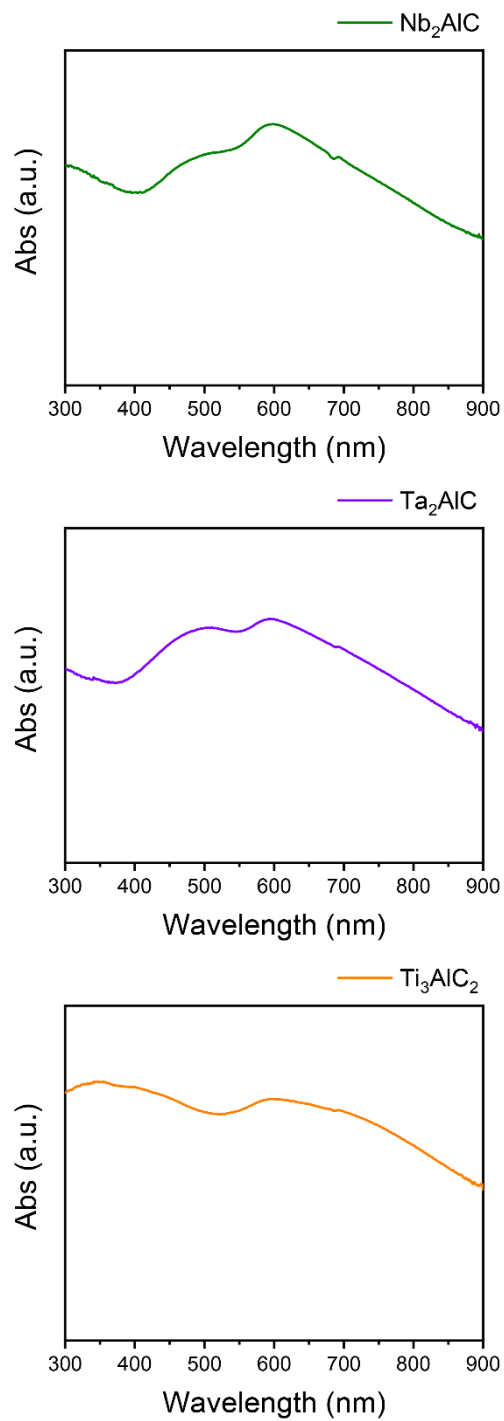

**Figure S6.** UV-Vis absorbance spectra of Nb<sub>2</sub>AlC, Ta<sub>2</sub>AlC, and Ti<sub>3</sub>AlC<sub>2</sub>.

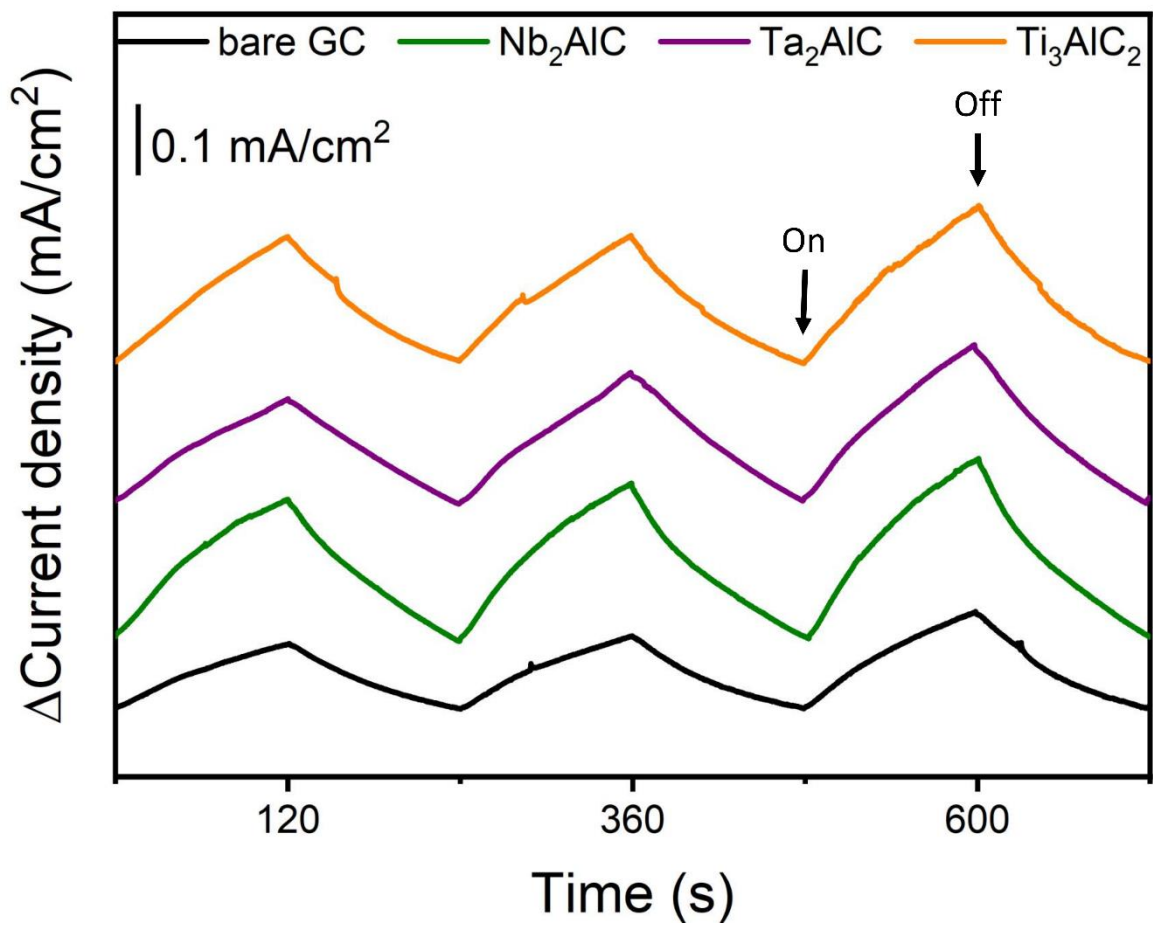

**Figure S7.** Chronoamperometry measurement for representation of the photoresponses of MAX on glassy carbon (GC) electrode at  $-0.56 \text{ V}$  vs. RHE with regular on/off of the 660 nm LED irradiation.
